# Supplementary material
Source: PubMed Central journal article supplement (PMC5441566)
Supplement: NIHMS857649-supplement-supplemental.pdf [file NIHMS857649-supplement-supplemental.pdf]

## Supplementary Online Content

Lui H, Petukhova MV, Sampson NA, et al; World Health Organization World Mental Health Survey Collaborators. Association of *DSM-IV* posttraumatic stress disorder with traumatic experience type and history in the World Health Organization World Mental Health Surveys. *JAMA Psychiatry*. Published online January 4, 2017. doi:10.1001/jamapsychiatry.2016.3783

**eTable 1.** World Mental Health Survey Sample Characteristics by World Bank Income Categories

**eTable 2.** Study Institutional Review Boards (IRB) and Consent Features Across WMH Survey Initiative

**eTable 3.** Lifetime Prevalence of Traumatic Experiences (TE) and Mean Number of TEs by World Mental Health Survey (n = 54 601)

**eTable 4.** Odds of *DSM-IV* or CIDI PTSD Among People Exposed to Randomly Selected TE in Cross-national Sample by Country Income, Survey Response Rate, and Length of Recalls, Controlling for Survey, Sex, Age at Random Event, and Age at Interview

This supplementary material has been provided by the authors to give readers additional information about their work.

| <b>eTable 1. World Mental Health Survey Sample Characteristics by World Bank Income Categories<sup>a</sup></b> |                     |                                                                                                                      |             |           |                 |                 |                            |                            |
|----------------------------------------------------------------------------------------------------------------|---------------------|----------------------------------------------------------------------------------------------------------------------|-------------|-----------|-----------------|-----------------|----------------------------|----------------------------|
| Country by income category                                                                                     | Survey <sup>b</sup> | Sample characteristics <sup>c</sup>                                                                                  | Field dates | Age range | Sample size     |                 |                            | Response rate <sup>d</sup> |
|                                                                                                                |                     |                                                                                                                      |             |           | Part I          | Part II         | Assessed for Random Events |                            |
| <b>I. Low and lower middle income countries</b>                                                                |                     |                                                                                                                      |             |           |                 |                 |                            |                            |
| Colombia                                                                                                       | NSMH                | All urban areas of the country (approximately 73% of the total national population)                                  | 2003        | 18-65     | 4,426           | 2,381           | 2,068                      | 87.7                       |
| Peru                                                                                                           | EMSMP               | All urban areas of the country.                                                                                      | 2004-5      | 18-65     | 3,930           | 1,801           | 1,530                      | 90.2                       |
| Ukraine                                                                                                        | CMDPSD              | Nationally representative.                                                                                           | 2002        | 18-91     | 4,725           | 1,720           | 1,167                      | 78.3                       |
| <b>TOTAL</b>                                                                                                   |                     |                                                                                                                      |             |           | <b>(13,081)</b> | <b>(5,902)</b>  | <b>(4,765)</b>             | <b>84.7</b>                |
| <b>II. Upper-middle income countries</b>                                                                       |                     |                                                                                                                      |             |           |                 |                 |                            |                            |
| Brazil - São Paulo                                                                                             | São Paulo Megacity  | São Paulo metropolitan area.                                                                                         | 2005-8      | 18-93     | 5,037           | 2,942           | 1,803                      | 81.3                       |
| Bulgaria                                                                                                       | NSHS                | Nationally representative.                                                                                           | 2002-6      | 18-98     | 5,318           | 2,233           | 449                        | 72.0                       |
| Colombia – Medellín <sup>e</sup>                                                                               | MMHHS               | Medellin metropolitan area                                                                                           | 2011-12     | 19-65     | 3,261           | 1,673           | 1,387                      | 97.2                       |
| Lebanon                                                                                                        | LEBANON             | Nationally representative.                                                                                           | 2002-3      | 18-94     | 2,857           | 1,031           | 871                        | 70.0                       |
| Mexico                                                                                                         | M-NCS               | All urban areas of the country (approximately 75% of the total national population).                                 | 2001-2      | 18-65     | 5,782           | 2,362           | 1,818                      | 76.6                       |
| Romania                                                                                                        | RMHS                | Nationally representative.                                                                                           | 2005-6      | 18-96     | 2,357           | 2,357           | 997                        | 70.9                       |
| South Africa <sup>f</sup>                                                                                      | SASH                | Nationally representative.                                                                                           | 2002-4      | 18-92     | 4,315           | 4,315           | 1,483                      | 87.1                       |
| <b>TOTAL</b>                                                                                                   |                     |                                                                                                                      |             |           | <b>(28,927)</b> | <b>(16,913)</b> | <b>(8,808)</b>             | <b>78.5</b>                |
| <b>III. High-income countries</b>                                                                              |                     |                                                                                                                      |             |           |                 |                 |                            |                            |
| Belgium                                                                                                        | ESEMeD              | Nationally representative. The sample was selected from a national register of Belgium residents                     | 2001-2      | 18-95     | 2,419           | 1,043           | 693                        | 50.6                       |
| France                                                                                                         | ESEMeD              | Nationally representative. The sample was selected from a national list of households with listed telephone numbers. | 2001-2      | 18-97     | 2,894           | 1,436           | 1,040                      | 45.9                       |
| Germany                                                                                                        | ESEMeD              | Nationally representative.                                                                                           | 2002-3      | 19-95     | 3,555           | 1,323           | 909                        | 57.8                       |
| Israel                                                                                                         | NHS                 | Nationally representative.                                                                                           | 2003-4      | 21-98     | 4,859           | 4,859           | 1,494                      | 72.6                       |
| Italy                                                                                                          | ESEMeD              | Nationally representative. The sample was selected from municipality resident registries.                            | 2001-2      | 18-100    | 4,712           | 1,779           | 1,043                      | 71.3                       |
| Japan                                                                                                          | WMHJ 2002-2006      | Eleven metropolitan areas.                                                                                           | 2002-6      | 20-98     | 4,129           | 1,682           | 1,137                      | 55.1                       |
| Netherlands                                                                                                    | ESEMeD              | Nationally representative. The sample was selected from municipal postal registries.                                 | 2002-3      | 18-95     | 2,372           | 1,094           | 765                        | 56.4                       |
| New Zealand <sup>f</sup>                                                                                       | NZMHS               | Nationally representative.                                                                                           | 2004-5      | 18-98     | 12,790          | 7,312           | 6,089                      | 73.3                       |
| N. Ireland                                                                                                     | NISHS               | Nationally representative.                                                                                           | 2005-8      | 18-97     | 4,340           | 1,986           | 877                        | 68.4                       |
| Spain                                                                                                          | ESEMeD              | Nationally representative.                                                                                           | 2001-2      | 18-98     | 5,473           | 2,121           | 1,244                      | 78.6                       |

|                  |                |                            |         |       |                  |                 |                 |             |
|------------------|----------------|----------------------------|---------|-------|------------------|-----------------|-----------------|-------------|
| Spain - Murcia   | PEGASUS-Murcia | Murcia region.             | 2010-12 | 18-96 | 2,621            | 1,459           | 891             | 67.4        |
| United States    | NCS-R          | Nationally representative. | 2001-3  | 18-99 | 9,282            | 5,692           | 4,921           | 70.9        |
| <b>TOTAL</b>     |                |                            |         |       | <b>(59,446)</b>  | <b>(31,786)</b> | <b>(21,103)</b> | <b>66.1</b> |
| <b>IV. TOTAL</b> |                |                            |         |       | <b>(101,454)</b> | <b>(54,601)</b> | <b>(34,676)</b> | <b>71.3</b> |

<sup>a</sup> The World Bank (2012) Data. Accessed May 12, 2012 at: <http://data.worldbank.org/country>. Some of the WMH countries have moved into new income categories since the surveys were conducted. The income groupings above reflect the status of each country at the time of data collection. The current income category of each country is available at the preceding URL.

<sup>b</sup> NSMH (The Colombian National Study of Mental Health); EMSMP (La Encuesta Mundial de Salud Mental en el Peru); CMDPSD (Comorbid Mental Disorders during Periods of Social Disruption); NSHS (Bulgaria National Survey of Health and Stress); MMHHS (Medellin Mental Health Household Study); LEBANON (Lebanese Evaluation of the Burden of Ailments and Needs of the Nation); M-NCS (The Mexico National Comorbidity Survey); RMHS (Romania Mental Health Survey); SASH (South Africa Health Survey); ESEMeD (The European Study Of The Epidemiology Of Mental Disorders); NHS (Israel National Health Survey); WMHJ2002-2006 (World Mental Health Japan Survey); NZMHS (New Zealand Mental Health Survey); NISHS (Northern Ireland Study of Health and Stress); PEGASUS-Murcia (Psychiatric Enquiry to General Population in Southeast Spain-Murcia); NCS-R (The US National Comorbidity Survey Replication).

<sup>c</sup> Most WMH surveys are based on stratified multistage clustered area probability household samples in which samples of areas equivalent to counties or municipalities in the US were selected in the first stage followed by one or more subsequent stages of geographic sampling (e.g., towns within counties, blocks within towns, households within blocks) to arrive at a sample of households, in each of which a listing of household members was created and one or two people were selected from this listing to be interviewed. No substitution was allowed when the originally sampled household resident could not be interviewed. These household samples were selected from Census area data in all countries other than France (where telephone directories were used to select households) and the Netherlands (where postal registries were used to select households). Several WMH surveys (Belgium, Germany, Italy, Poland) used municipal or country resident registries to select respondents without listing households. The Japanese sample is the only totally un-clustered sample, with households randomly selected in each of the 11 metropolitan areas and one random respondent selected in each sample household. 15 of the 22 surveys are based on nationally representative household samples.

<sup>d</sup> The response rate is calculated as the ratio of the number of households in which an interview was completed to the number of households originally sampled, excluding from the denominator households known not to be eligible either because of being vacant at the time of initial contact or because the residents were unable to speak the designated languages of the survey. The weighted average response rate is 71.3%.

<sup>e</sup> Colombia moved from the "lower and lower-middle income" to the "upper-middle income" category between 2003 (when the Colombian National Study of Mental Health was conducted) and 2010 (when the Medellin Mental Health Household Study was conducted), hence Colombia's appearance in both income categories. For more information, please see footnote a.

<sup>f</sup> For the purposes of cross-national comparisons we limit the sample to those 18+.

**eTable 2.** Study Institutional Review Boards (IRB) and Consent Features Across WMH Survey Initiative

| Country                              | Type of organization                                             | IRB/ Ethics approval                                                                                                                                                                                                                                                               | Type of consent obtained |
|--------------------------------------|------------------------------------------------------------------|------------------------------------------------------------------------------------------------------------------------------------------------------------------------------------------------------------------------------------------------------------------------------------|--------------------------|
| Belgium                              | Government agency                                                | Ethics Committee of the Institute of Public Health (Federal Public Service Health, Food Chain Safety, and Environment)                                                                                                                                                             | Verbal                   |
| Brazil (Sao Paulo metropolitan area) | Academic center/Institute;<br>Private for profit company         | Research and Ethics Committee of the School of Medicine, University of Sao Paulo                                                                                                                                                                                                   | Written                  |
| Bulgaria                             | Academic center/Institute                                        | Ethics approval from the Deputy Minister and head of the Executive Committee of the National Psychiatric Program                                                                                                                                                                   | Verbal                   |
| Colombia                             | Non-profit organization                                          | Ethics Committee for the FES Social Foundation                                                                                                                                                                                                                                     | Verbal                   |
| Colombia-Medellin                    | Academic center/Institute                                        | Comité Institucional de Ética Universidad CES                                                                                                                                                                                                                                      | Written                  |
| France                               | Academic center/Institute                                        | Acta No. 39                                                                                                                                                                                                                                                                        | Written                  |
| Germany                              | Academic center/Institute                                        | Ethics Committee of the University of Leipzig                                                                                                                                                                                                                                      | Verbal                   |
| Israel                               | Government agency                                                | Human Subjects Committee for survey and field procedures in Eitanim-Kfar Shaul Hospital                                                                                                                                                                                            | Verbal                   |
| Italy                                | Private for profit company                                       | Italian National Institute of Health                                                                                                                                                                                                                                               | Written                  |
| Japan                                | Government agency;<br>Academic center/Institute                  | National Center of Neurology and Psychiatry Okayama University School of Medicine, Nagasaki University School of Medicine, Keio University School of Medicine, Jichi University School of Medicine, Juntendo University School of Medicine, Yamagata University School of Medicine | Written                  |
| Lebanon                              | Not for profit research institute; Non-governmental organization | University of Balamand Faculty of Medicine Institutional Review Board                                                                                                                                                                                                              | Verbal                   |
| Mexico                               | Academic center/Institute                                        | Ethics committee in research of the National Institute of Psychiatry Ramon de la Fuente Muñiz                                                                                                                                                                                      | Verbal                   |
| Netherlands                          | Private for profit company;<br>Academic center/Institute         | Ethics Committee of the Netherlands Institute of Mental Health and Addiction                                                                                                                                                                                                       | Written                  |
| New Zealand                          | Ministry of health                                               | New Zealand Health Ethics Committees (approval from 14 separate committees)                                                                                                                                                                                                        | Written                  |
| Northern Ireland                     | Academic center/Institute                                        | University of Ulster Ethics Committee                                                                                                                                                                                                                                              | Written                  |
| Peru                                 | Institute of health                                              | National Institute of Health Peru                                                                                                                                                                                                                                                  | Verbal                   |
| Romania                              | Academic center/Institute;<br>Public organization                | Ethic Commission, Scientific Board of National Institute for Research and Development in Health                                                                                                                                                                                    | Verbal                   |
| South Africa                         | Academic center                                                  | Human Subjects committees of the University of Michigan, Harvard Medical School, and the Medical University of South Africa                                                                                                                                                        | Written                  |

|                          |                           |                                                                                                                                         |         |
|--------------------------|---------------------------|-----------------------------------------------------------------------------------------------------------------------------------------|---------|
| Spain                    | Academic center/Institute | Ethical Committee of Sant Joan de Deu Serveis de Salut Mental and Ethical Committee of IMIM-Hospital del Mar Medical Research Institute | Written |
| Spain-Murcia             | Public health authority   | The Clinical Research Ethics Committee of the University Hospital Virgen de la Arrixaca of Murcia (Spain)                               | Written |
| Ukraine                  | Academic center/Institute | Kiev International Institute of Sociology, and Ukrainian Psychiatric Association                                                        | Written |
| United States of America | Academic center/Institute | Human Subjects Committees of the Institute for Social Research at the University of Michigan and of Harvard Medical School              | Verbal  |

**eTable 3.** Lifetime Prevalence of Traumatic Experiences (TE) and Mean Number of TEs by World Mental Health Survey (n = 54 601)

| Country by income category <sup>a</sup>  | Lifetime prevalence of TE/ any |       | Mean number of TE/any |        |
|------------------------------------------|--------------------------------|-------|-----------------------|--------|
|                                          | %                              | (SE)  | Mean                  | (SE)   |
| I. Low and lower-middle income countries |                                |       |                       |        |
| Colombia                                 | 82.7                           | (1.4) | 5.5                   | (0.2)  |
| Peru                                     | 83.1                           | (0.8) | 4.4                   | (0.1)  |
| Ukraine                                  | 84.6                           | (1.7) | 4.4                   | (0.2)  |
| II. Upper-middle income countries        |                                |       |                       |        |
| Brazil - São Paulo                       | 73.8                           | (1.5) | 4.5                   | (0.1)  |
| Bulgaria                                 | 28.6                           | (1.3) | 2.6                   | (0.1)  |
| Colombia - Medellin                      | 75.1                           | (2.6) | 5.4                   | (0.3)  |
| Lebanon                                  | 81.1                           | (2.7) | 4.8                   | (0.2)  |
| Mexico                                   | 68.8                           | (1.8) | 4.2                   | (0.1)  |
| Romania                                  | 41.5                           | (1.1) | 3.1                   | (0.2)  |
| South Africa                             | 73.8                           | (1.2) | 4.3                   | (0.1)  |
| III. High-income countries               |                                |       |                       |        |
| Belgium                                  | 65.8                           | (3.1) | 3.5                   | (0.2)  |
| France                                   | 72.7                           | (2.3) | 3.9                   | (0.2)  |
| Germany                                  | 67.3                           | (2.2) | 4.0                   | (0.2)  |
| Israel                                   | 74.8                           | (0.7) | 4.4                   | (0.1)  |
| Italy                                    | 56.1                           | (2.2) | 4.0                   | (0.2)  |
| Japan                                    | 60.7                           | (1.7) | 3.4                   | (0.2)  |
| Netherlands                              | 65.6                           | (2.8) | 3.6                   | (0.2)  |
| New Zealand                              | 79.3                           | (0.8) | 5.2                   | (0.1)  |
| N. Ireland                               | 60.6                           | (1.7) | 4.1                   | (0.1)  |
| Spain                                    | 54                             | (1.7) | 2.8                   | (0.1)  |
| Spain - Murcia                           | 62.4                           | (1.9) | 2.5                   | (0.1)  |
| United States                            | 82.7                           | (0.9) | 5.9                   | (0.1)  |
| IV. Total                                |                                |       |                       |        |
|                                          | 70.3                           | (0.3) | 4.5                   | (0.04) |

<sup>a</sup> The World Bank (2012) Data. Accessed May 12, 2012 at: <http://data.worldbank.org/country>. Some of the WMH countries have moved into new income categories since the surveys were conducted. The income groupings above reflect the status of each country at the time of data collection. The current income category of each country is available at the preceding URL.

**eTable 4.** Odds of *DSM-IV* or CIDI PTSD Among People Exposed to Randomly Selected TE in Cross-national Sample by Country Income, Survey Response Rate, and Length of Recalls, Controlling for Survey, Sex, Age at Random Event, and Age at Interview

|                                                 | Country income |            |            |            | Survey response rate         |            |               |                 | Length of recalls     |            |                                |              |
|-------------------------------------------------|----------------|------------|------------|------------|------------------------------|------------|---------------|-----------------|-----------------------|------------|--------------------------------|--------------|
|                                                 | High           |            | Middle/Low |            | Greater than or equal to 60% |            | Less than 60% |                 | Greater than 15 years |            | Less than or equal to 15 years |              |
|                                                 | OR             | (95% CI)   | OR         | (95% CI)   | OR                           | (95% CI)   | OR            | (95% CI)        | OR                    | (95% CI)   | OR                             | (95% CI)     |
| I. Random TE                                    |                |            |            |            |                              |            |               |                 |                       |            |                                |              |
| Civilian in war zone                            | 0.3            | (0.1-1.2)  | 0.2        | (0.1-0.7)  | 0.3                          | (0.1-1.0)  | <0.001        | (<0.001-<0.001) | 0.4                   | (0.1-1.2)  | 0.0                            | (<0.001-0.1) |
| Civilian in region of terror                    | 0.1            | (0.0-0.4)  | 1.2        | (0.4-3.7)  | 0.3                          | (0.1-0.9)  | 0.5           | (0.1-4.4)       | 0.2                   | (0.1-0.7)  | 0.8                            | (0.2-3.1)    |
| Kidnapped                                       | 5.9            | (3.0-11.9) | 3.7        | (1.3-10.5) | 5.1                          | (2.9-9.0)  | <0.001        | (<0.001-0.0)    | 4.6                   | (2.1-10.0) | 4.6                            | (1.8-11.5)   |
| Witnessed death, dead body, or serious injury   | 0.6            | (0.4-1.0)  | 0.9        | (0.5-1.9)  | 0.8                          | (0.5-1.2)  | 0.3           | (0.1-1.0)       | 0.6                   | (0.4-1.1)  | 0.8                            | (0.4-1.6)    |
| Witnessed atrocities                            | 0.5            | (0.2-1.6)  | 18.6       | (4.5-76.8) | 4.4                          | (1.0-19.8) | 0.3           | (0.0-2.6)       | 6.1                   | (1.4-26.3) | 1.3                            | (0.2-7.5)    |
| Experience of sexual violence                   | 2.4            | (1.7-3.5)  | 2.8        | (1.5-4.9)  | 2.6                          | (1.9-3.7)  | 2.0           | (1.0-3.9)       | 2.2                   | (1.5-3.3)  | 3.1                            | (2.0-4.6)    |
| Natural disaster                                | 0.1            | (0.0-0.2)  | 0.0        | (0.0-0.3)  | 0.1                          | (0.0-0.2)  | <0.001        | (<0.001-<.001)  | 0.1                   | (0.0-0.2)  | 0.1                            | (0.0-0.2)    |
| Unexpected death of loved one                   | 1.4            | (0.9-2.2)  | 2.1        | (1.3-3.5)  | 1.7                          | (1.2-2.4)  | 1.0           | (0.4-2.2)       | 1.6                   | (1.0-2.6)  | 1.6                            | (1.1-2.4)    |
| All others                                      | 1.0            | --         | 1.0        | --         | 1.0                          | --         | 1.0           | --              | 1.0                   | --         | 1.0                            | --           |
| II. Prior lifetime exposure to the same TE type |                |            |            |            |                              |            |               |                 |                       |            |                                |              |
| Participation in organized violence             | 0.3            | (0.1-1.2)  | 0.1        | (0.0-1.0)  | 0.2                          | (0.1-0.8)  | 0.2           | (0.0-1.9)       | 0.1                   | (0.0-0.9)  | 0.4                            | (0.1-1.5)    |
| Experience of physical violence                 | 0.9            | (0.2-3.1)  | 4.3        | (0.9-19.4) | 1.5                          | (0.5-4.8)  | 4.6           | (0.7-27.8)      | 0.5                   | (0.1-5.6)  | 3.5                            | (1.2-10.2)   |
| All others                                      | 1.0            | --         | 1.0        | --         | 1.0                          | --         | 1.0           | --              | 1.0                   | --         | 1.0                            | --           |
| III. Prior lifetime exposure to other TEs       |                |            |            |            |                              |            |               |                 |                       |            |                                |              |
| Participation in organized violence             | 1.4            | (1.1-1.7)  | 1.0        | (0.7-1.5)  | 1.3                          | (1.1-1.6)  | 0.6           | (0.4-1.0)       | 1.2                   | (0.9-1.7)  | 1.3                            | (1.0-1.7)    |
| Experience of physical violence                 | 1.4            | (1.2-1.7)  | 1.5        | (1.0-2.1)  | 1.4                          | (1.2-1.7)  | 1.4           | (0.8-2.5)       | 1.4                   | (1.1-1.8)  | 1.5                            | (1.1-1.9)    |
| Raped                                           | 2.5            | (1.6-4.1)  | 2.7        | (1.1-6.4)  | 2.6                          | (1.7-4.1)  | 1.0           | (0.4-2.5)       | 2.0                   | (1.3-3.2)  | 3.0                            | (1.6-5.6)    |
| Sexually assaulted                              | 1.3            | (0.9-2.0)  | 2.7        | (1.3-5.8)  | 1.6                          | (1.0-2.4)  | 1.5           | (0.6-3.4)       | 1.7                   | (1.0-2.7)  | 1.4                            | (0.8-2.5)    |
| All others                                      | 1.0            | --         | 1.0        | --         | 1.0                          | --         | 1.0           | --              | 1.0                   | --         | 1.0                            | --           |
| IV. Cross-validated AUC                         | 0.76           |            | 0.70       |            | 0.73                         |            | 0.73          |                 | 0.68                  |            | 0.73                           |              |
